# Supplementary material for: Exosomes and STUB1/CHIP cooperate to maintain intracellular proteostasis
Source: PubMed Central journal article supplement (PMC6794069; doi:10.1371/journal.pone.0223790), 2019-10-15

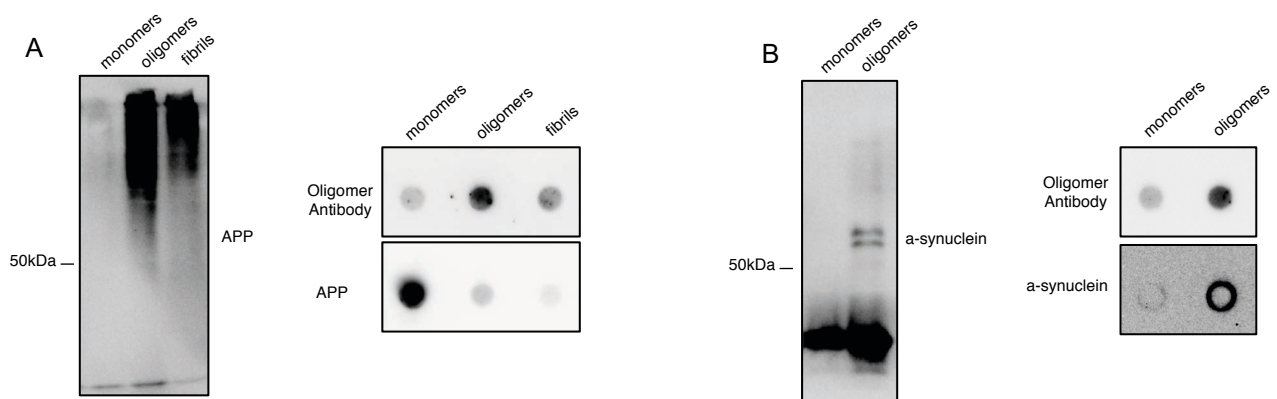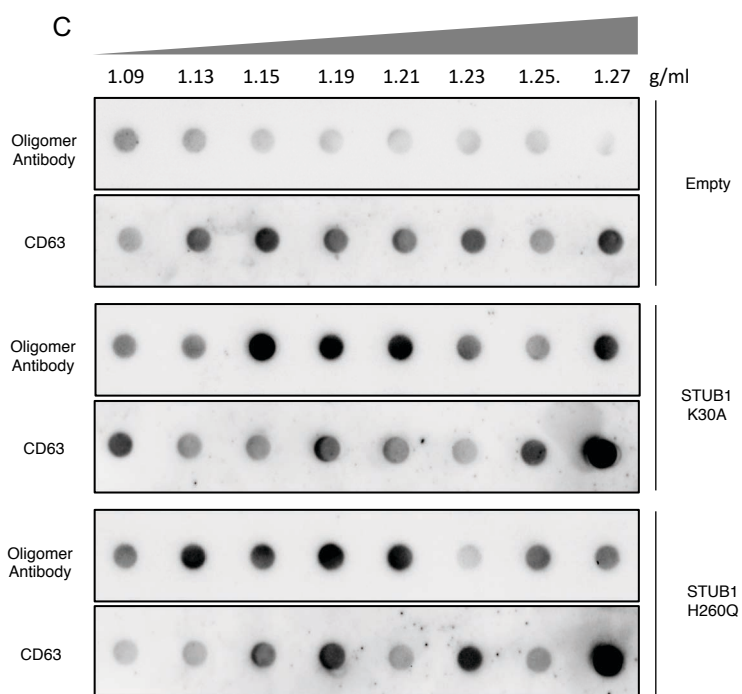

Supplement: pone.0223790.s002.pdf [file pone.0223790.s002.pdf]
